# Supplementary material
Source: Springer Nature journal article supplement (https://www.springermedizin.de/resource/supplementary/13000_2012_535_MOESM2_ESM.pdf/9624932)

Control

Cancer

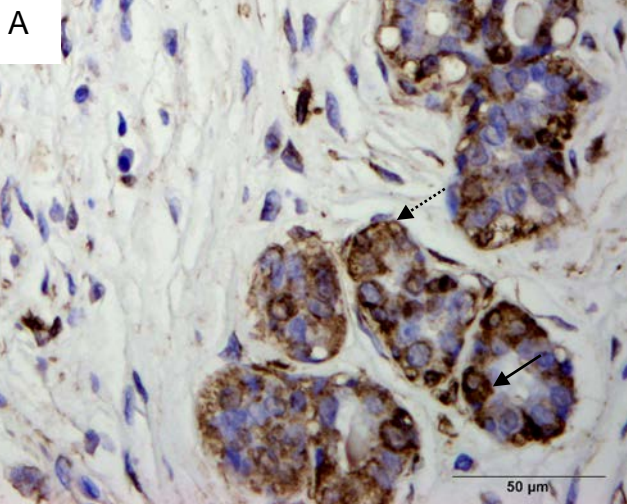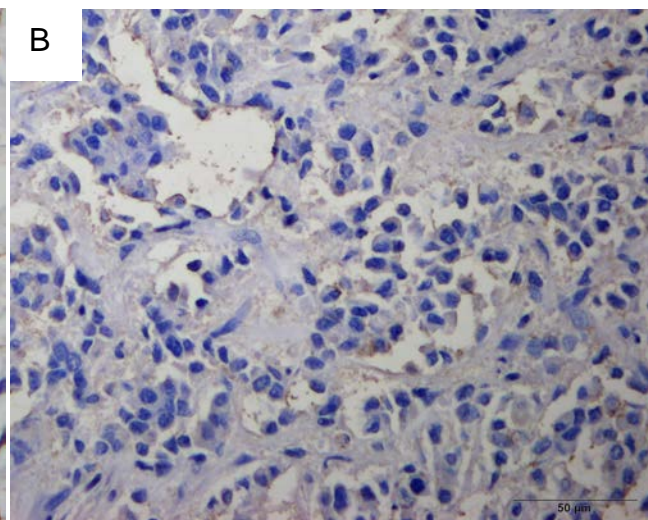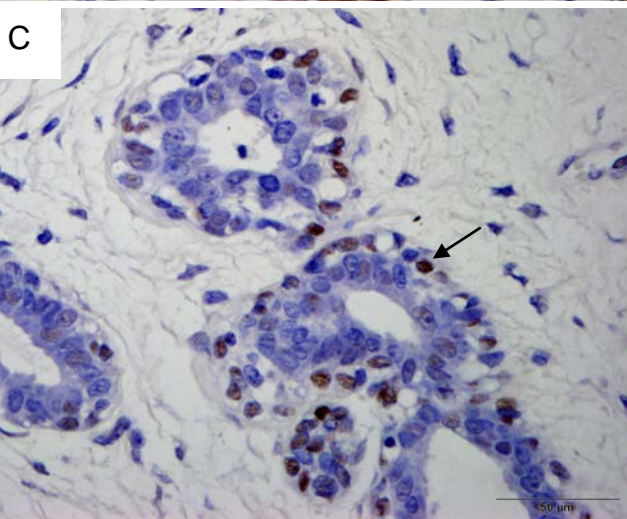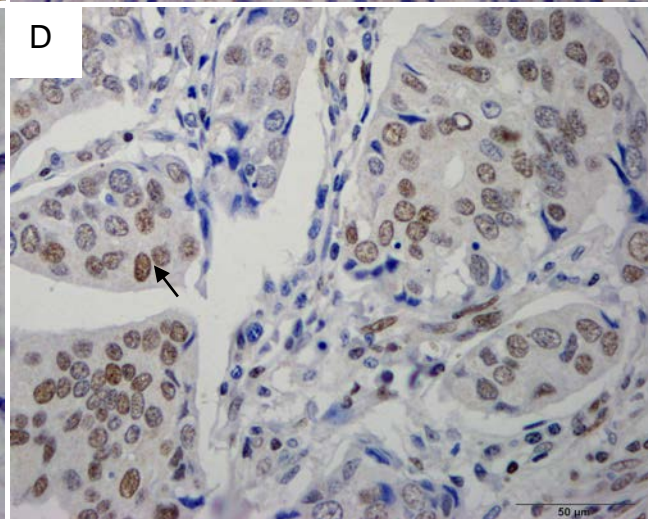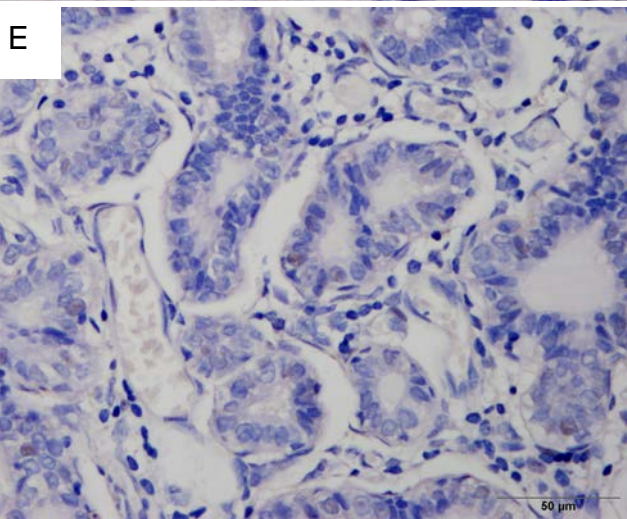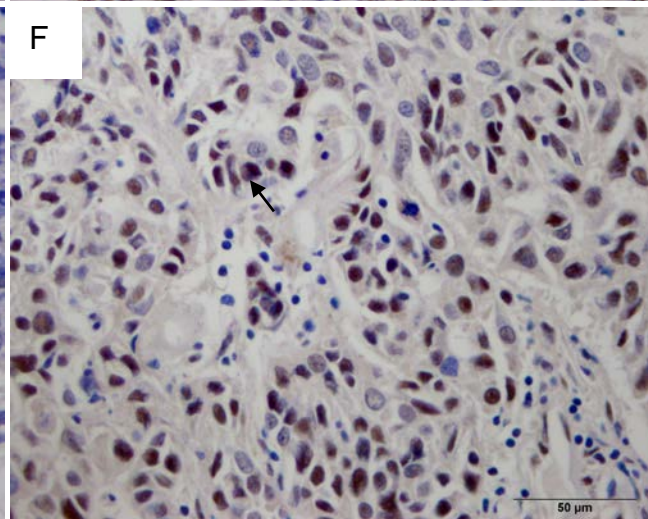

Supplement: MOESM2 [file 9624932]
